# Supplementary material for: Retrospective Performance Analyses of over Two Million U.S. QuantiFERON Blood Sample Results
Source: PubMed Central journal article supplement (PMC8552680; doi:10.1128/spectrum.00096-21), 2021-07-28

## Online Supplementary Material

**Supplemental Fig. 1.** QFT proportion of positive results by state

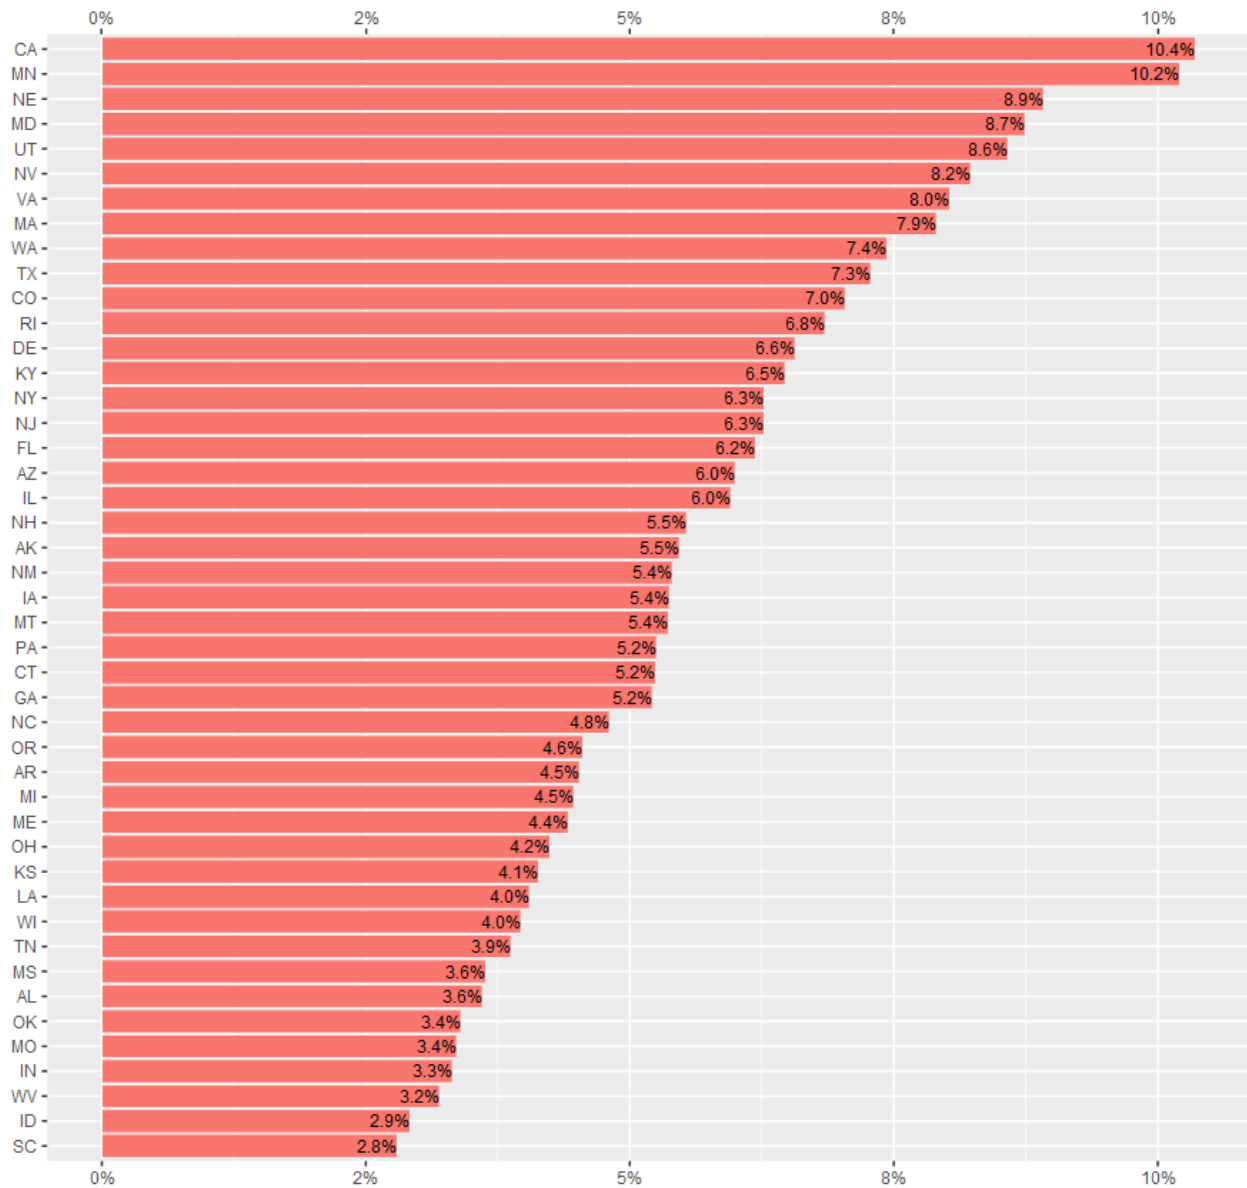

**Supplemental Fig. 2.** Proportion of positive QFT results by method, region, age, and gender. 1T represents QFT-Plus with one heparin tube draw, whereas 4T represents QFT-Plus with a four-tube draw; 3T represents QFT-GIT

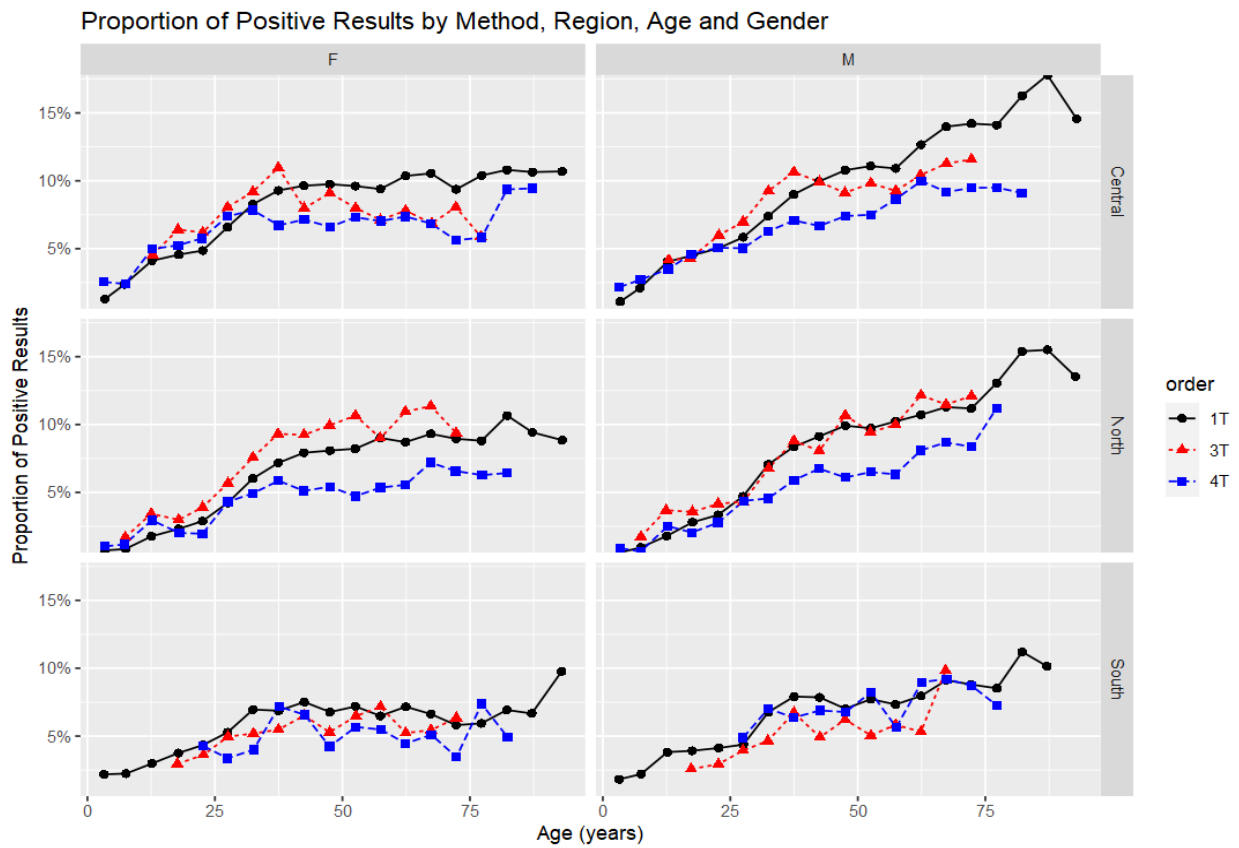

**Supplemental Fig. 3.** Proportion of positive QFT results by clinical specialty. Most listed specialties had  $\geq 1,000$  tests; a minimum number of tests for this figure was 100 tests per specialty. 1T represents QFT-PLUS with one heparin tube draw, whereas 4T represents QFT-Pus with a four-tube draw; 3T represents QFT-GIT.

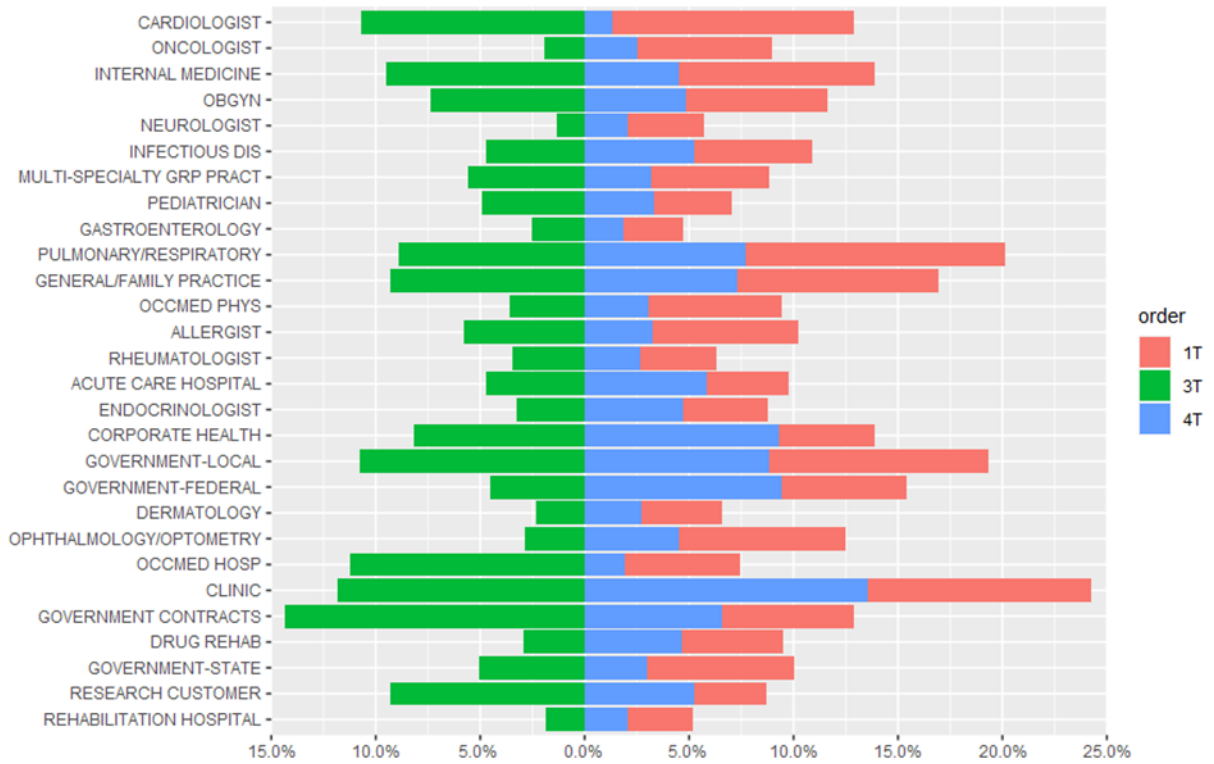

**Supplemental Fig. 4.** Proportion of indeterminate QFT results by method, region, age, and gender. 1T represents QFT-PLUS with one heparin tube draw, whereas 4T represents QFT-Plus with a four-tube draw; 3T represents QFT-GIT

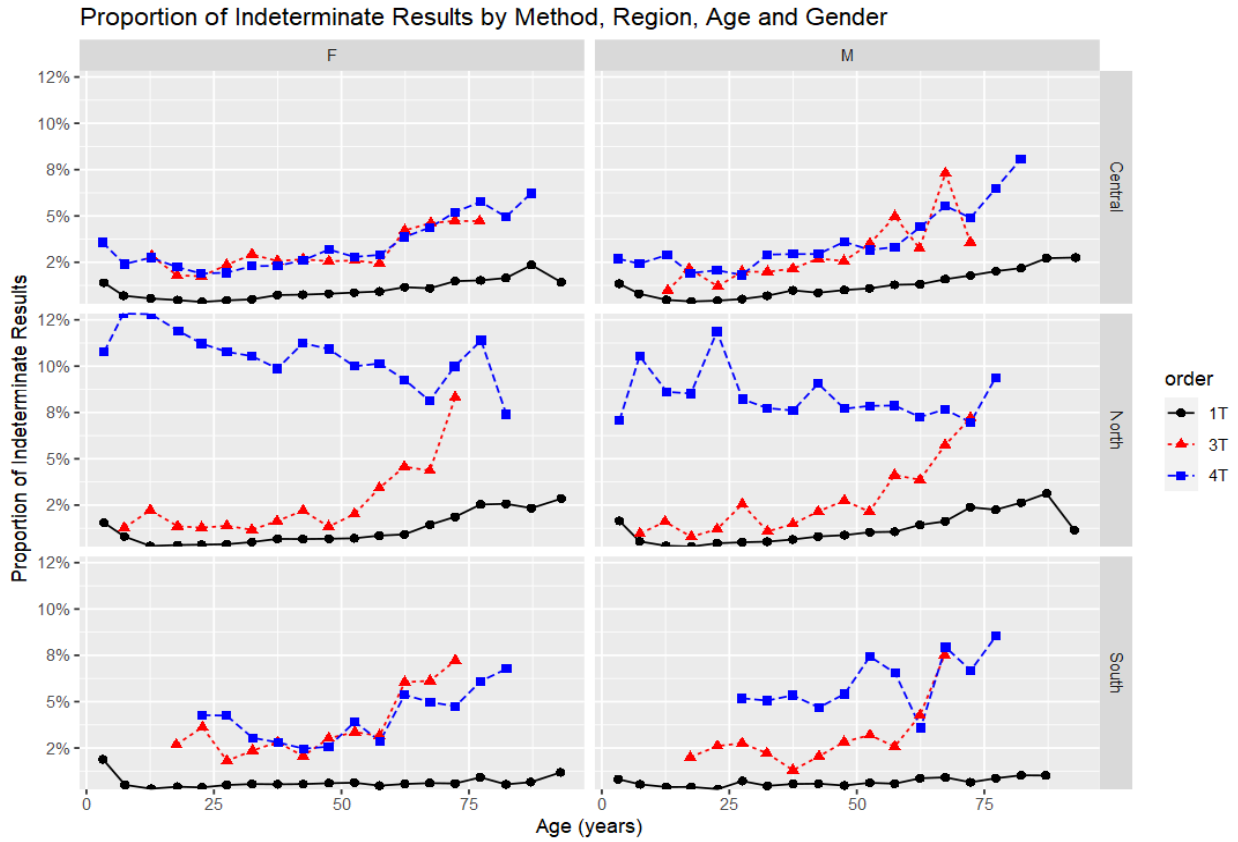

**Supplemental Fig. 5.** Proportion of indeterminate QFT results by clinical specialty. Most listed specialties had  $\geq 1,000$  tests; a minimum number of tests for this figure was 100 tests per specialty. 1T represents QFT-PLUS with one heparin tube draw, whereas 4T represents QFT-Pus with a four-tube draw; 3T represents QFT-GIT.

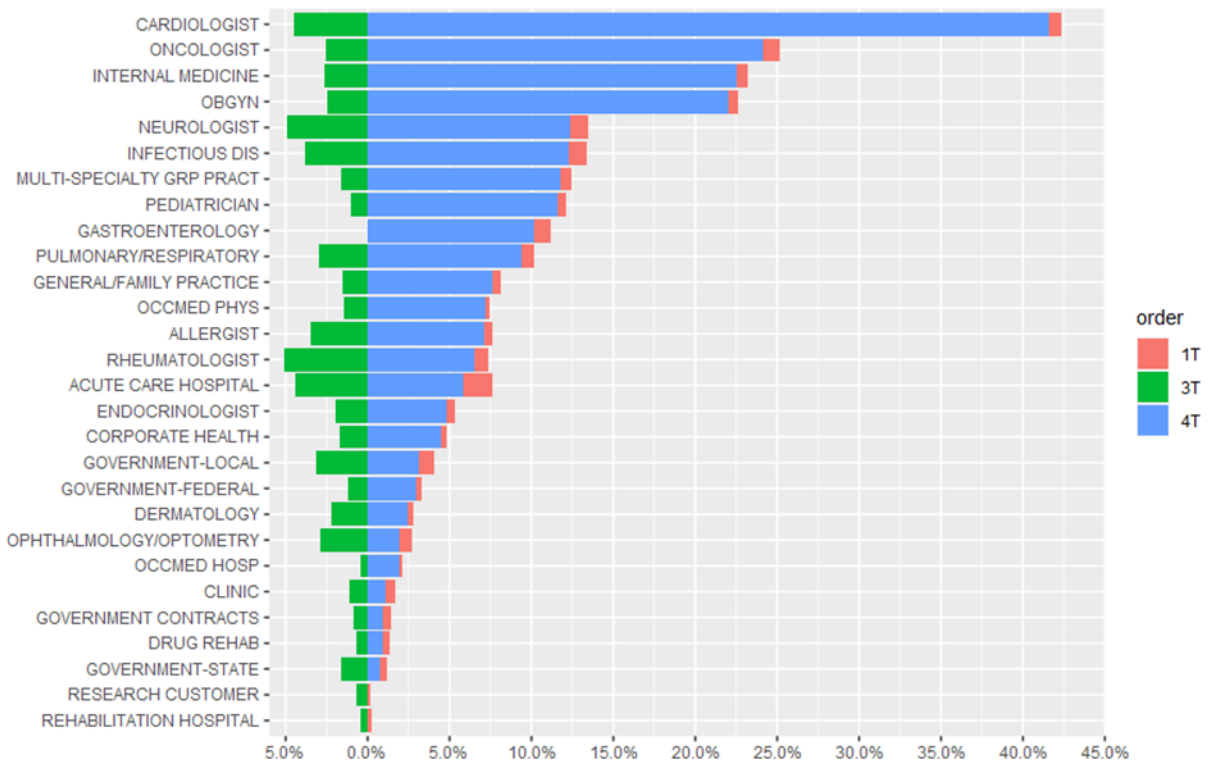

Supplement: spectrum00096-21_supp_1_seq2.pdf [file spectrum00096-21_supp_1_seq2.pdf]
